# Supplementary material for: Altered excitatory-inhibitory balance within somatosensory cortex is associated with enhanced plasticity and pain sensitivity in a mouse model of multiple sclerosis
Source: Springer Nature journal article supplement (doi:10.1186/s12974-016-0609-4), 2016-06-10

**A**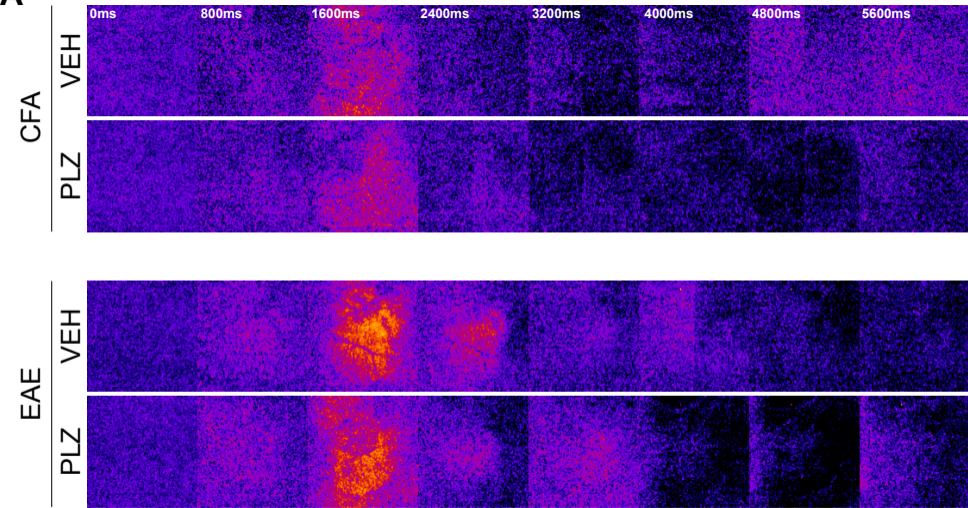**B**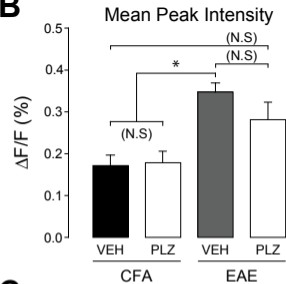**C**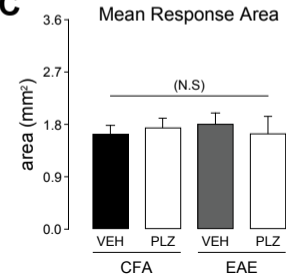

Supplement: MOESM5 [file 10244616]
